# Supplementary material for: Polydiallylammonium interpenetrating cationic network ion-solvating membranes for anion exchange membrane water electrolyzers
Source: Royal Society of Chemistry journal article supplement (doi:10.1039/d3ta01511d), 2023-01-01
Supplement: d3ta01511d1.pdf [file d3ta01511d1.pdf]

## **Supplementary Information for**

# **Polydiallylammonium Interpenetrating Cationic Network Ion-Solvating Membranes for Anion Exchange Membrane Water Electrolyzers**

*Jiyeon Jung,<sup>§abc</sup> Young Sang Park,<sup>§abc</sup> Dong Jun Hwang,<sup>abd</sup> Gwan Hyun Choi,<sup>a</sup> Dong Hoon Choi,<sup>d</sup> Hyun Jin Park,<sup>e\*</sup> Cheol-Hee Ahn,<sup>c</sup> Seung Sang Hwang,<sup>ab</sup> Albert S. Lee<sup>ab\*</sup>*

<sup>a</sup> Materials Architecturing Research Center, Korea Institute of Science and Technology, Seong Buk Gu, Hwarangno 14 gil-5 Seoul, Korea 02792

<sup>b</sup>Convergence Research Center for Solutions to Electromagnetic Interference in Future-mobility, Korea Institute of Science and Technology, Hwarang-ro 14-gil 5, Seongbuk-gu, Seoul 02792, Republic of Korea

<sup>c</sup> Research Institute of Advanced Materials (RIAM), Department of Materials Science and Engineering, Seoul National University, Gwanak-ro 1, Gwanak-gu, Seoul, 08826

<sup>d</sup> Research Institute for Natural Sciences, Department of Chemistry, Korea University, Anam-ro 145, Seongbuk-gu, Seoul, 02841

<sup>e</sup> FC Material R&D Group, KOLON Industries Inc., 110, Magokdong-ro, Gangseo-gu, Seoul 07793, Republic of Korea

<sup>§</sup>These authors contributed equally to this research.

Corresponding Authors' E-mail: [hyunjin\\_park1@kolon.com](mailto:hyunjin_park1@kolon.com), [aslee@kist.re.kr](mailto:aslee@kist.re.kr)

# Table of Contents

## Supplementary Figures

**Fig. S1** Schematic diagram of the conductivity cell

**Fig. S2** (a)  $^1\text{H}$  NMR and (b)  $^{19}\text{F}$  NMR spectra of TMA-70

**Fig. S3** (a) Scheme for synthesis of BTMDAA (b)  $^1\text{H}$  NMR and (c)  $^{13}\text{C}$  NMR spectra of BTMDAA

**Fig. S4** SEM images and EDS of  $\text{BD}_3/\text{xEVOH}$

**Fig. S5** TGA curves of  $\text{BD}_3/\text{xEVOH}$  and crosslinked EVOH

**Fig. S6** (a) Mechanical properties and (b) ionic conductivity of  $\text{BD}_3/60$  EVOH and  $\text{BD}_3/60$  PVA

**Fig. S7** (a) Hydroxide conductivity by temperature of  $\text{BD}_3/50\text{EVOH}$  membrane in 1M KOH solution. (b) Hydroxide conductivity of  $\text{BD}_3/50\text{EVOH}$  membrane according to KOH concentration. Conductivity were measured at 70 °C.

**Fig. S8** Mechanical strength of  $\text{BD}_3/50\text{EVOH}$  before and after alkaline stability test in 1M KOH at 70°C for 300 hrs.

**Fig. S9** FT-IR spectra of  $\text{BD}_3/50\text{EVOH}$  membrane before and after immersed in 1M KOH at 70 °C for 310 hrs.

**Fig. S10** Oxidative stability of the  $\text{BD}_3/\text{xEVOH}$  and FAA-3 during the Fenton test (3%  $\text{H}_2\text{O}_2$  containing 4 ppm  $\text{Fe}^{2+}$ ) for 8h at 80°C

**Fig. S11** AEM electrolyzer performance of commercial membrane FAA-3 for reference at 1.0 M KOH, 70 °C. (a) LSV curve, (b) EIS data

**Fig. S12** AEM electrolyzer performance with  $\text{BD}_3/50\text{EVOH}$  and different concentration of KOH at 70 °C. (a) PGM iridium oxide, (b) non-PGM cobalt used in anode

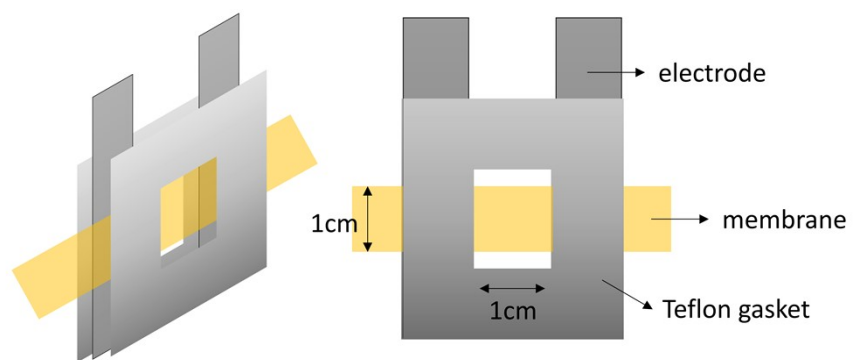

**Fig. S1** Schematic diagram of the conductivity cell

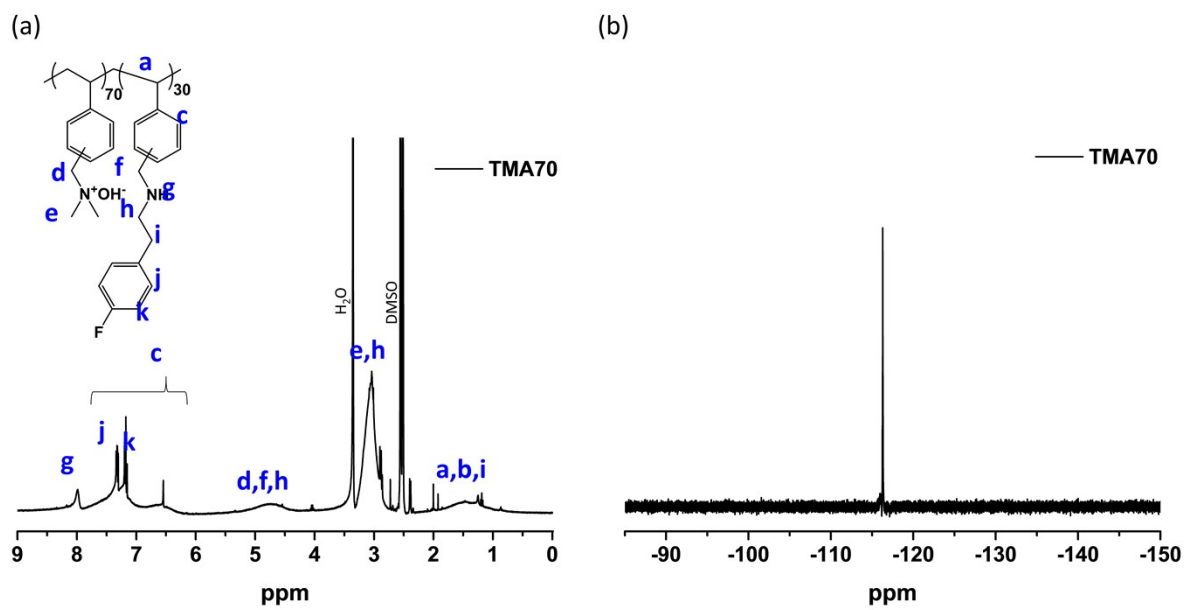

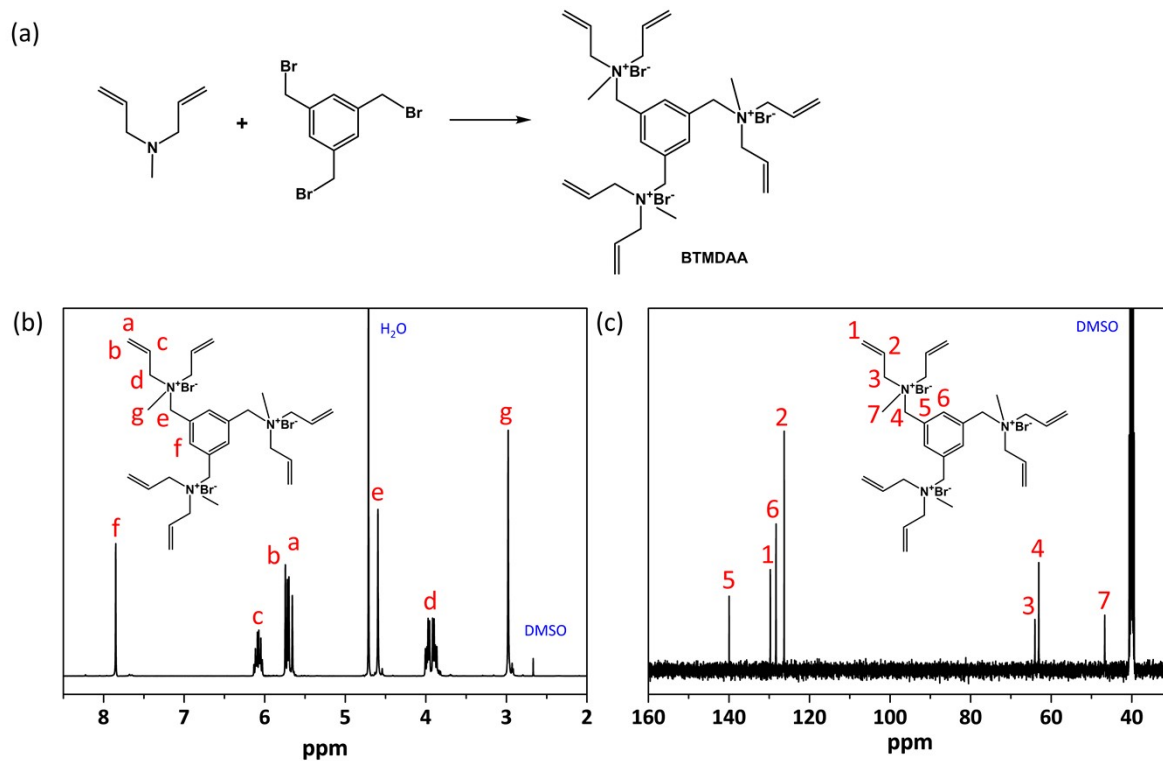

**Fig. S3** (a) Scheme for synthesis of BTMDAA (b)  $^1\text{H}$  NMR and (c)  $^{13}\text{C}$  NMR spectra of BTMDAA

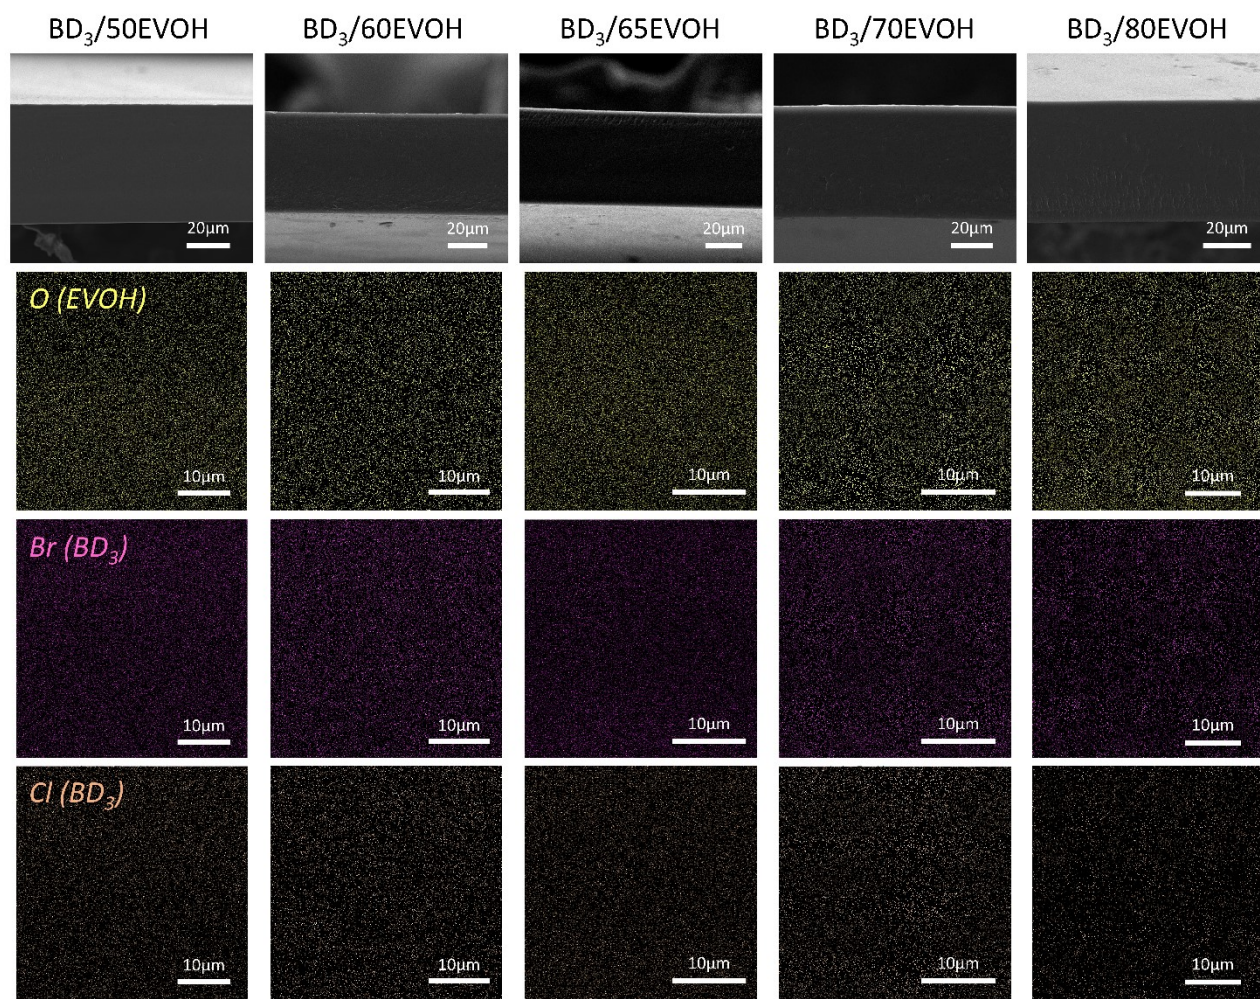

**Fig. S4** SEM images and EDS of BD<sub>3</sub>/xEVOH

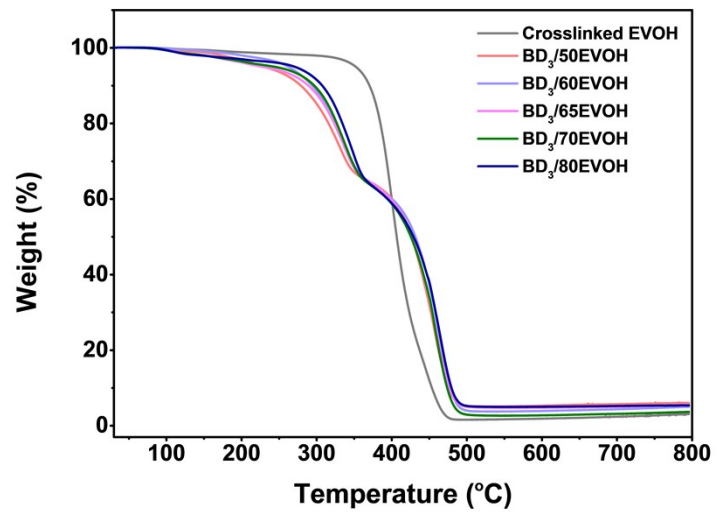

Fig. S5 TGA curves of BD<sub>3</sub>/xEVOH and crosslinked EVOH

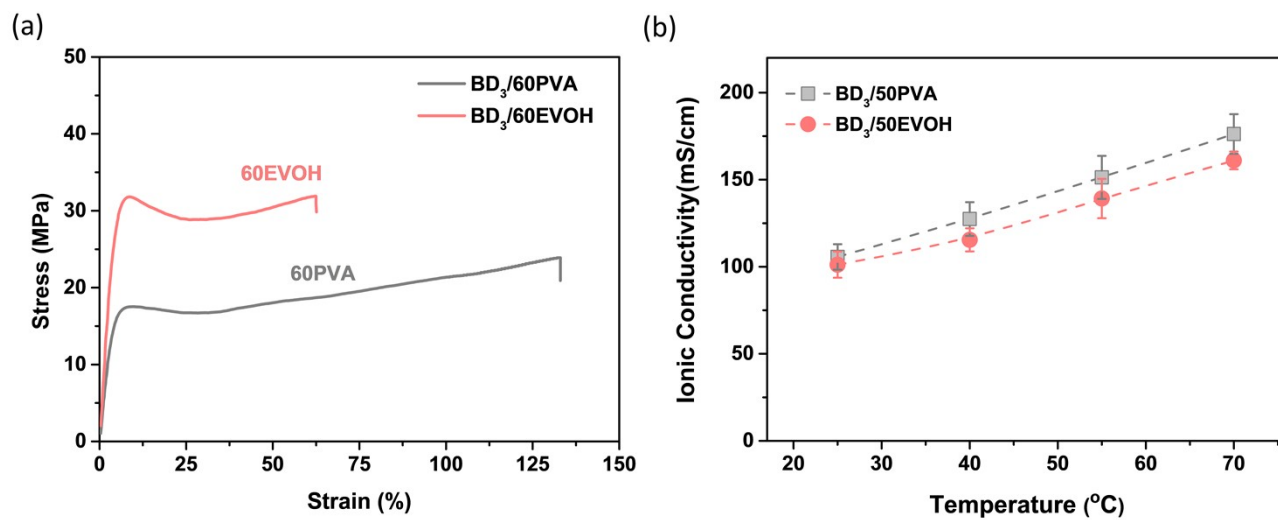

**Fig. S6 (a)** Mechanical properties and **(b)** ionic conductivity of BD<sub>3</sub>/60 EVOH and BD<sub>3</sub>/60 PVA



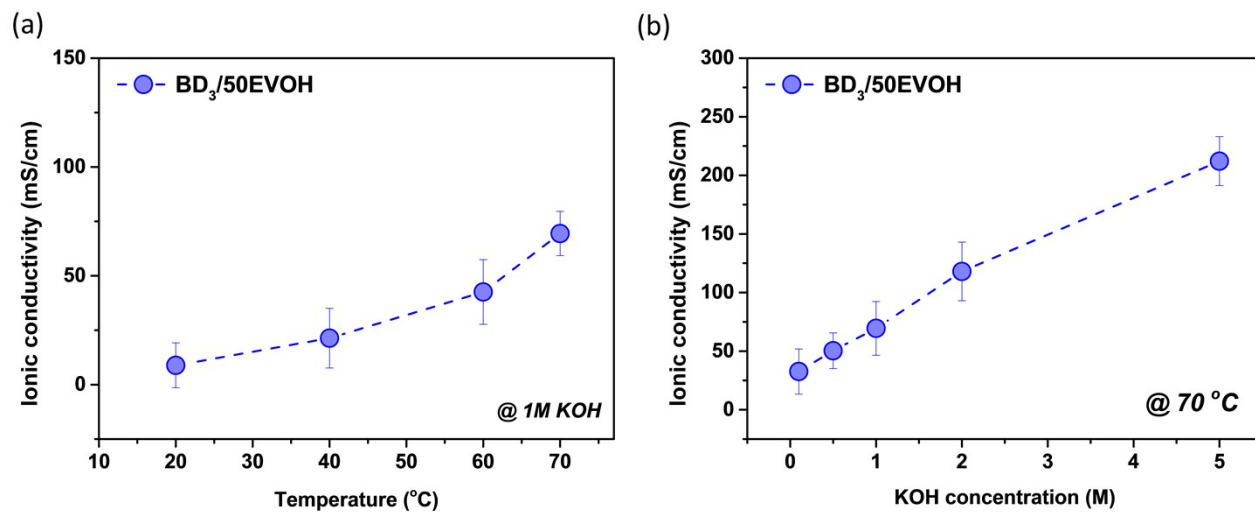

**Fig. S7** (a) Hydroxide conductivity by temperature of BD<sub>3</sub>/50EVOH membrane in 1M KOH solution. (b) Hydroxide conductivity of BD<sub>3</sub>/50EVOH membrane according to KOH concentration. Conductivity were measured at 70 °C.

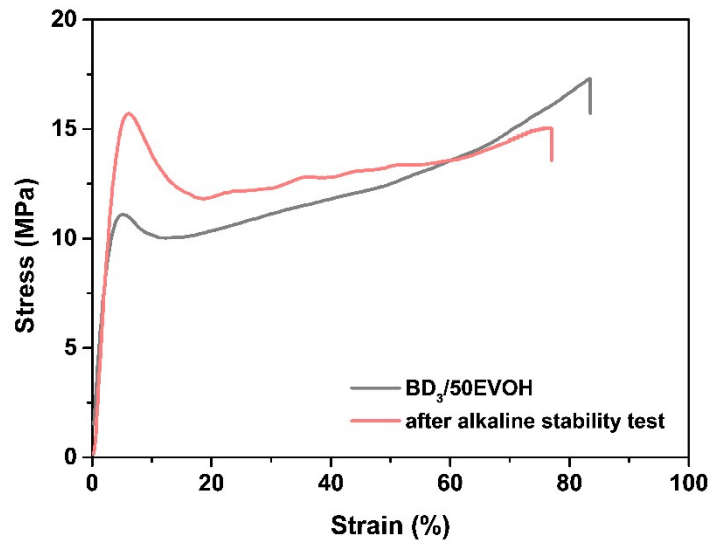

**Fig. S8** Mechanical strength of BD<sub>3</sub>/50EVOH before and after alkaline stability test in 1M KOH at 70°C for 300 hrs.

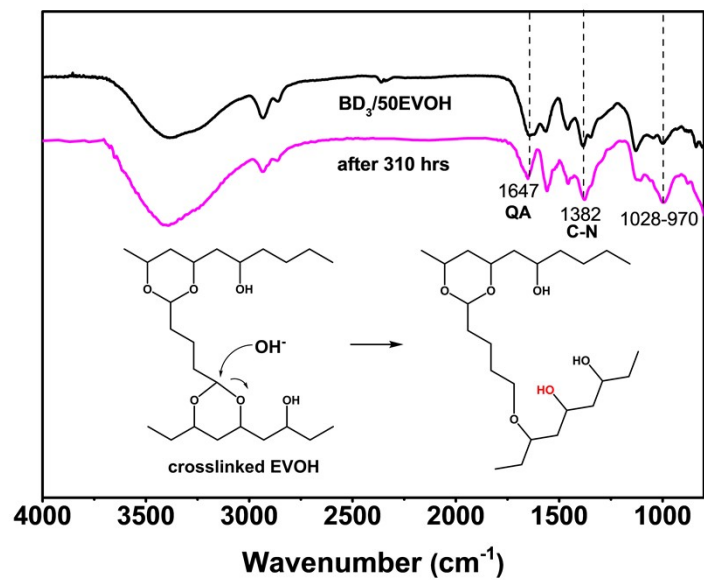

**Fig. S9** FT-IR spectra of BD<sub>3</sub>/50EVOH membrane before and after immersed in 1M KOH at 70 °C for 310 hrs.

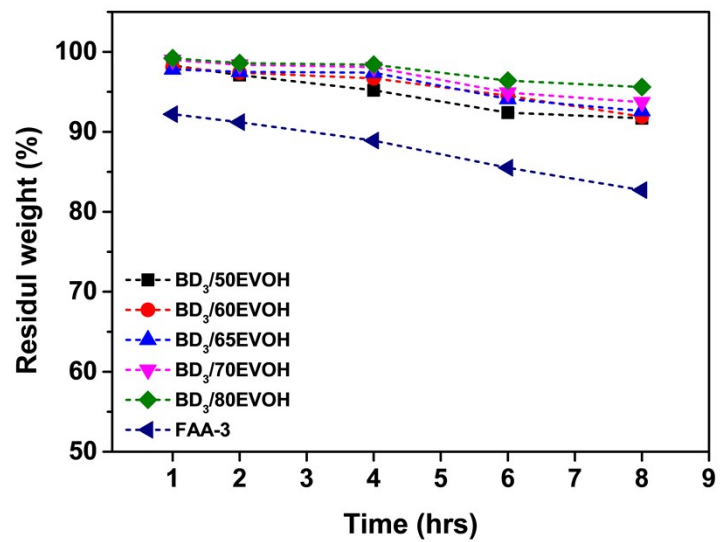

**Fig. S10** Oxidative stability of the BD<sub>3</sub>/xEVOH and FAA-3 during the Fenton test (3% H<sub>2</sub>O<sub>2</sub> containing 4 ppm Fe<sup>2+</sup>) for 8h at 80°C

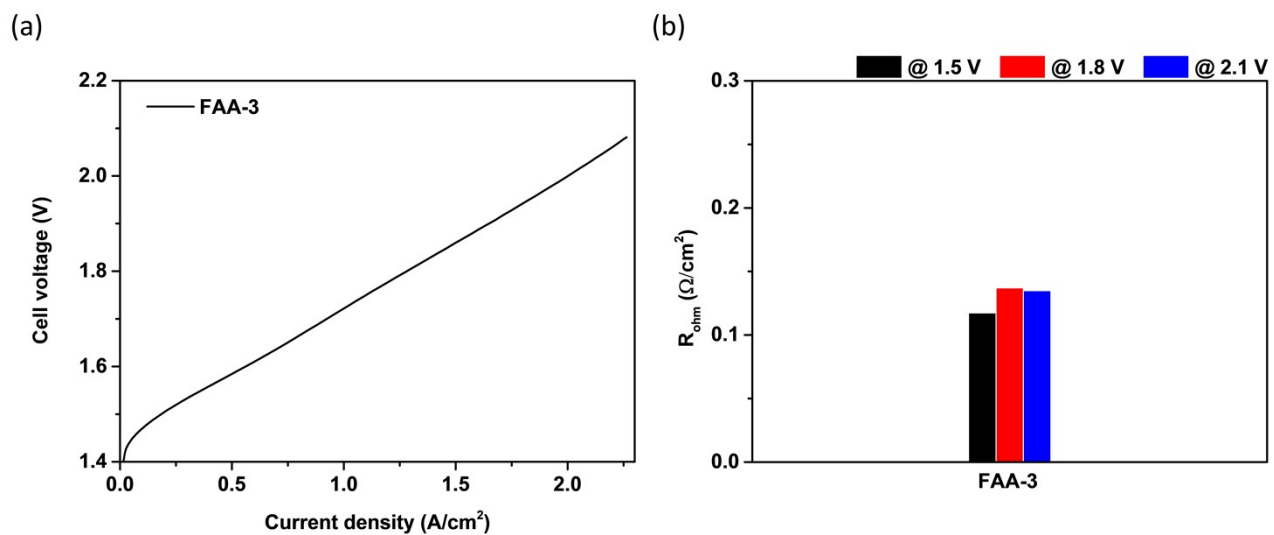

**Fig. S11** AEM electrolyzer performance of commercial membrane FAA-3 for reference at 1.0 M KOH, 70 °C. (a) LSV curve, (b) EIS data

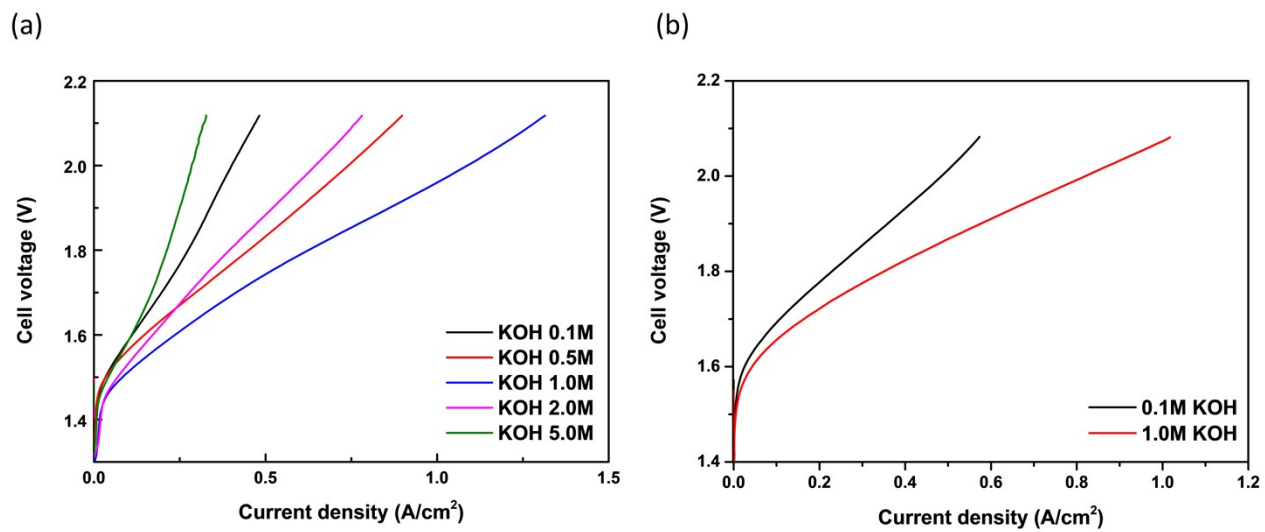

**Fig. S12** AEM electrolyzer performance with BD<sub>3</sub>/50EVOH and different concentration of KOH at 70 °C. (a) PGM iridium oxide, (b) non-PGM cobalt used in anode
